# Supplementary material for: Reinforcement of nanostructured organogels by hydrogen bonds
Source: Royal Society of Chemistry journal article supplement (doi:10.1039/c6ra03567a), 2016-01-01
Supplement: c6ra03567a1.pdf [file c6ra03567a1.pdf]

## Supporting Information

# Reinforcement of nanostructured organogels by hydrogen bonds

*Daniela Pirner, Martin Dulle, Miriam Mauer, and Stephan Förster\**

Department of Physical Chemistry I, University of Bayreuth, Universitätsstraße 30, 95447 Bayreuth,  
Germany

(stephan.foerster@uni-bayreuth.de)

### Polymer and Precursor Characterisation

#### <sup>1</sup>H-NMR:

*2(6-Isocyanatohexylaminocarbonylamino)-6-methyl-4[1H]pyrimidinone*

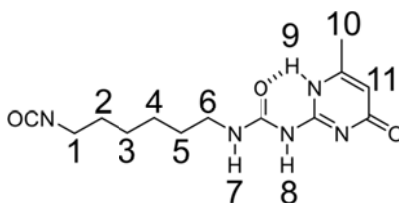

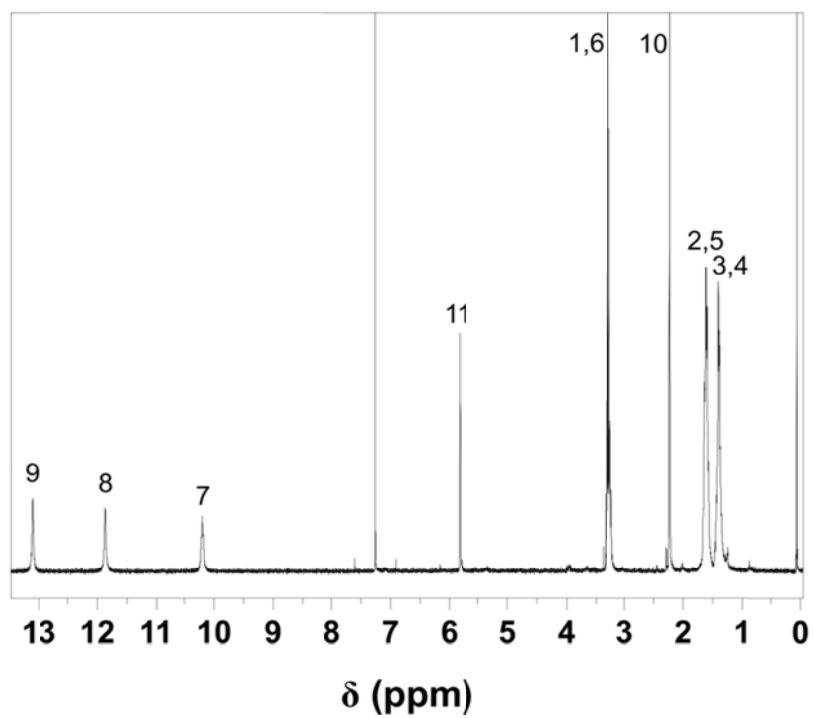

**Figure S1**  $^1\text{H-NMR}$  of 2(6-isocyanatohexylaminocarbonylamino)-6-methyl-4[1H]pyrimidinone in  $\text{CDCl}_3$  (300 MHz).

$^1\text{H-NMR}$  (300 MHz,  $\text{CDCl}_3$ ):  $\delta$  (ppm) = 1.23-1.49 (m, 4H,  $\text{H}_{3,4}$ ), 1.50-1.70 (m, 4H,  $\text{H}_{2,5}$ ), 2.23 (s, 3H,  $\text{H}_{10}$ ), 3.20-3.34 (m, 4H,  $\text{H}_{1,6}$ ), 5.82 (s, 1H,  $\text{H}_{11}$ ), 10.20 (s, 1H,  $\text{H}_7$ ), 11.87 (s, 1H,  $\text{H}_8$ ), 13.11 (s, 1H,  $\text{H}_9$ ).

PI-PS-OH

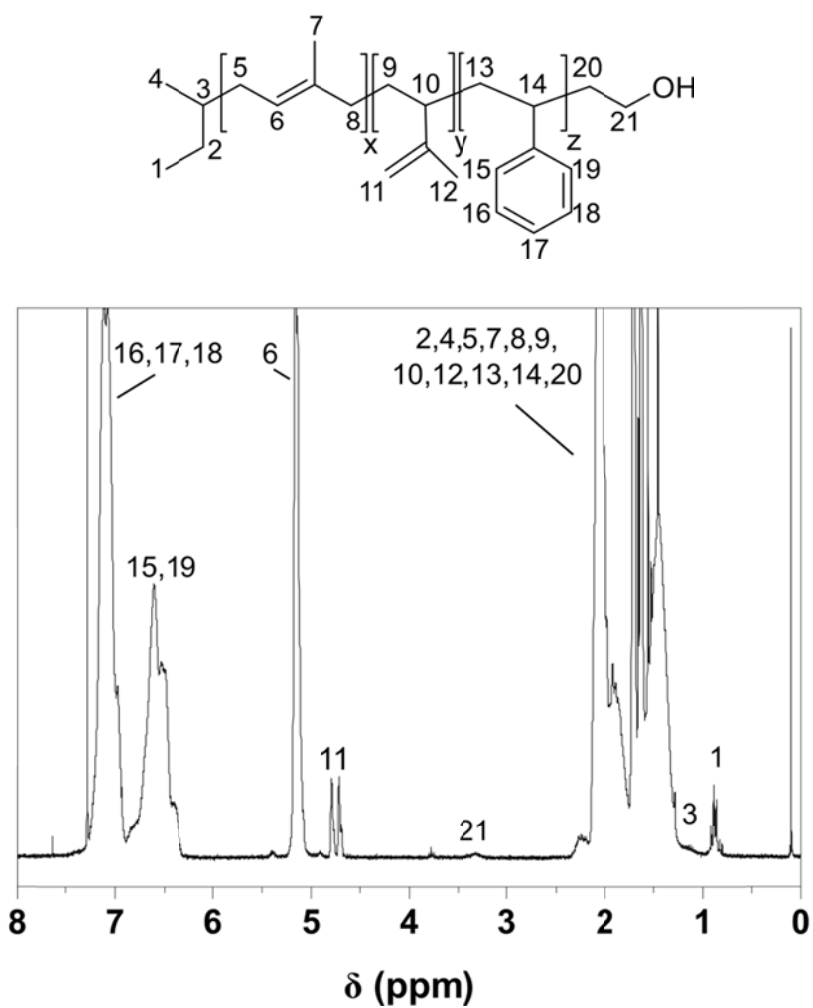

Figure S2: <sup>1</sup>H-NMR of poly(isoprene-*block*-styrene) in CDCl<sub>3</sub>.

<sup>1</sup>H-NMR (300 MHz, CDCl<sub>3</sub>): δ (ppm) = 0.76-0.90 (m, 3H, H<sub>1</sub>), 1.00-1.19 (m, 1H, H<sub>3</sub>), 1.20-2.35 (m, 23H, H<sub>2,4,5,7,8,9,10,12,13,14,20</sub>), 3.60 (m, 2H, H<sub>21</sub>), 4.62-4.81 (m, 2H per unit 3,4-PI, H<sub>11</sub>), 5.00-5.21 (m, 1H per unit 1,4-PI, H<sub>6</sub>), 6.29-7.24 (m, 5H per unit PS, H<sub>15,16,17,18,19</sub>).

PI-PS-UPy

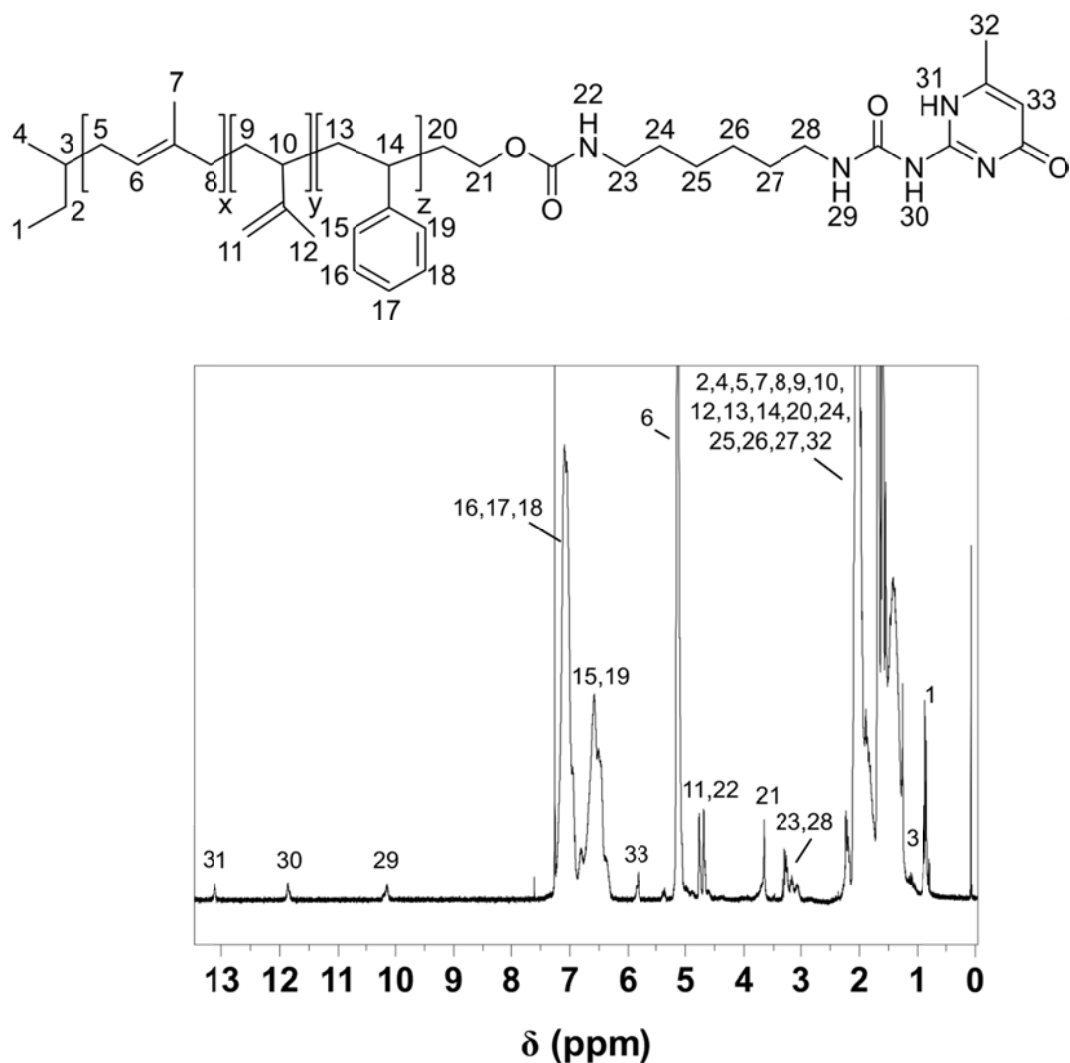

**Figure S3:** <sup>1</sup>H-NMR of poly(isoprene-*block*-styrene)-UPy in CDCl<sub>3</sub>.

<sup>1</sup>H-NMR (300 MHz, CDCl<sub>3</sub>):  $\delta$  (ppm) = 0.76-0.90 (m, 3H, H<sub>1</sub>), 1.00-1.19 (m, 1H, H<sub>3</sub>), 1.20-2.35 (m, 34H, H<sub>2,4,5,7,8,9,10,12,13,14,20,24,25,26,27,32</sub>), 2.97-3.31 (m, 4H, H<sub>23,28</sub>), 3.63-3.73 (m, 2H, H<sub>21</sub>), 4.62-4.81 (m, 2H per unit 3,4-PI, H<sub>11</sub> + s, 1H, H<sub>22</sub>), 5.00-5.21 (m, 1H per unit 1,4-PI, H<sub>6</sub>), 5.28 (s, 1H, H<sub>33</sub>) 6.29-7.24 (m, 5H per unit PS, H<sub>15,16,17,18,19</sub>), 10.20 (s, 1H, H<sub>29</sub>), 11.87 (s, 1H, H<sub>30</sub>), 13.11 (s, 1H, H<sub>31</sub>).

**GPC:**

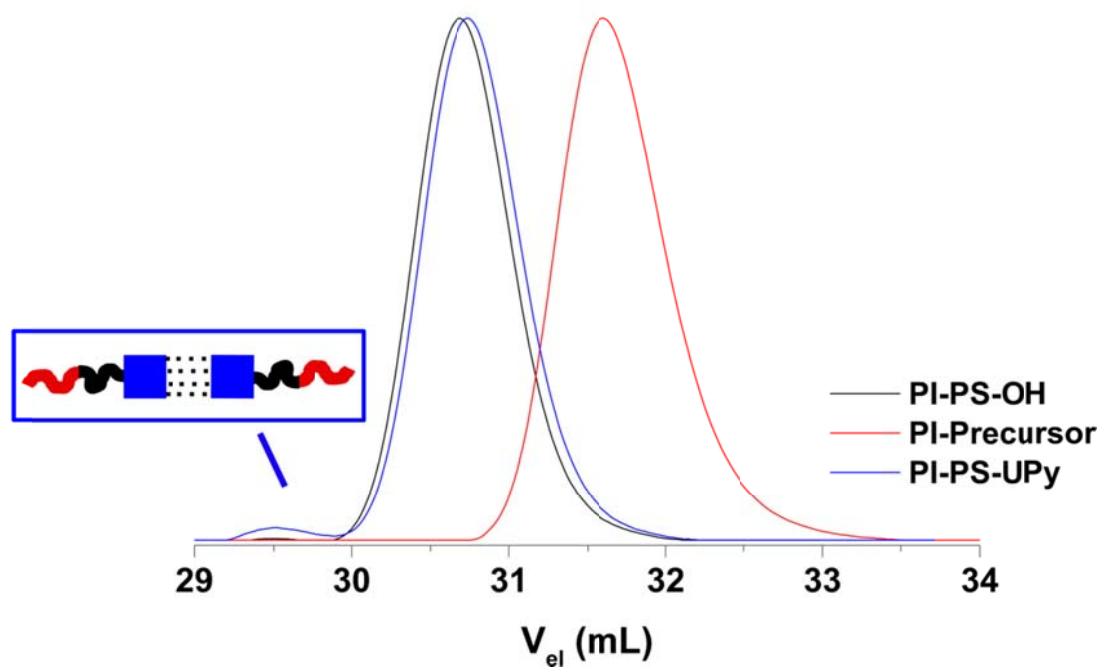

**Figure S4:** GPC measurements of poly(isoprene-*block*-styrene) (PI-PS), PI precursor, and PI-PS-UPy in THF at room temperature with a flow rate of 1 mL/min ( $c \approx 1$  mg/mL).
